# Supplementary material for: Electrostatically enhanced F⋯F interactions through hydrogen bonding, halogen bonding and metal coordination: an ab initio study
Source: Royal Society of Chemistry journal article supplement (doi:10.1039/c6cp03862j), 2016-01-01
Supplement: c6cp03862j1.pdf [file c6cp03862j1.pdf]

Electrostatically enhanced F...F interactions through hydrogen bonding,  
halogen bonding and metal coordination: An ab initio study.

A. Bauzá and A. Frontera\*

Department of Chemistry Universitat de les Illes Balears, Crta. de Valldemossa km 7.5,  
07122 Palma (Balears), Spain. E-mail: toni.frontera@uib.es;

Fax: +34 971 173426

**Electronic Supplementary Information**

Cartesian coordinates

7.

|   |            |           |            |
|---|------------|-----------|------------|
| C | 0.0000000  | 0.0000000 | -0.2244916 |
| C | 1.2023658  | 0.0000000 | 0.4605613  |
| C | -1.1413299 | 0.0000000 | 1.8514733  |
| C | -1.2023658 | 0.0000000 | 0.4605613  |
| H | 2.1453680  | 0.0000000 | -0.0716926 |
| H | -2.0586620 | 0.0000000 | 2.4321310  |
| H | -2.1453680 | 0.0000000 | -0.0716926 |
| F | 0.0000000  | 0.0000000 | -1.5640974 |
| N | 0.0000000  | 0.0000000 | 2.5524488  |
| C | 1.1413299  | 0.0000000 | 1.8514733  |
| H | 2.0586620  | 0.0000000 | 2.4321310  |
| F | 0.0000000  | 0.0000000 | -4.5921792 |
| H | 0.0000000  | 0.0000000 | -5.5166265 |

**8.**

|   |            |           |            |
|---|------------|-----------|------------|
| C | 0.0000000  | 0.0000000 | -0.8154219 |
| C | 1.2154598  | 0.0000000 | -0.1464470 |
| C | 1.2144026  | 0.0000000 | 1.2430581  |
| C | 0.0000000  | 0.0000000 | 1.9390716  |
| C | -1.2144026 | 0.0000000 | 1.2430581  |
| C | -1.2154598 | 0.0000000 | -0.1464470 |
| H | 2.1385607  | 0.0000000 | -0.7134574 |
| H | 2.1489831  | 0.0000000 | 1.7918484  |
| H | -2.1489831 | 0.0000000 | 1.7918484  |
| H | -2.1385607 | 0.0000000 | -0.7134574 |
| C | 0.0000000  | 0.0000000 | 3.3693797  |
| N | 0.0000000  | 0.0000000 | 4.5424454  |
| F | 0.0000000  | 0.0000000 | -2.1560660 |
| F | 0.0000000  | 0.0000000 | -5.1524459 |
| H | 0.0000000  | 0.0000000 | -6.0769671 |

**9.**

|   |            |           |            |
|---|------------|-----------|------------|
| C | 0.0000000  | 0.0000000 | -1.5887915 |
| C | 1.2151497  | 0.0000000 | -0.9187869 |
| C | 1.2139612  | 0.0000000 | 0.4702861  |
| C | 0.0000000  | 0.0000000 | 1.1739032  |
| C | -1.2139612 | 0.0000000 | 0.4702861  |
| C | -1.2151497 | 0.0000000 | -0.9187869 |
| H | 2.1386191  | 0.0000000 | -1.4855147 |
| H | -2.1498288 | 0.0000000 | 1.0175018  |
| H | -2.1386191 | 0.0000000 | -1.4855147 |

|   |           |           |            |
|---|-----------|-----------|------------|
| F | 0.0000000 | 0.0000000 | -2.9296320 |
| H | 2.1498288 | 0.0000000 | 1.0175018  |
| C | 0.0000000 | 0.0000000 | 2.5939429  |
| C | 0.0000000 | 0.0000000 | 3.8190517  |
| C | 0.0000000 | 0.0000000 | 5.1858392  |
| N | 0.0000000 | 0.0000000 | 6.3646001  |
| F | 0.0000000 | 0.0000000 | -5.9306832 |
| H | 0.0000000 | 0.0000000 | -6.8552030 |

**10.**

|   |            |            |           |
|---|------------|------------|-----------|
| C | 0.1202924  | -0.2823450 | 0.0000000 |
| C | 1.3303154  | 0.3997349  | 0.0000000 |
| C | 0.2325233  | 2.4101927  | 0.0000000 |
| C | -1.0150942 | 1.7916754  | 0.0000000 |
| C | -1.0822745 | 0.4020511  | 0.0000000 |
| H | 2.2655082  | -0.1512298 | 0.0000000 |
| H | 0.3121932  | 3.4924479  | 0.0000000 |
| H | -1.9202133 | 2.3873851  | 0.0000000 |
| H | -2.0207320 | -0.1394733 | 0.0000000 |
| N | 1.3906208  | 1.7360095  | 0.0000000 |
| F | 0.1244386  | -1.6229404 | 0.0000000 |
| F | 0.1292109  | -4.7495624 | 0.0000000 |
| H | 0.1332114  | -5.6739458 | 0.0000000 |

**11.**

|   |            |            |           |
|---|------------|------------|-----------|
| C | 0.7182854  | -0.0458942 | 0.0000000 |
| C | 0.4228075  | -1.4018893 | 0.0000000 |
| C | -0.9141652 | -1.7935987 | 0.0000000 |
| C | -1.9321439 | -0.8455381 | 0.0000000 |
| C | -1.6012145 | 0.5145167  | 0.0000000 |
| C | -0.2649892 | 0.9292977  | 0.0000000 |
| H | 1.2308896  | -2.1235653 | 0.0000000 |
| H | -1.1616965 | -2.8488276 | 0.0000000 |
| H | 0.0034279  | 1.9787604  | 0.0000000 |
| F | 2.0023093  | 0.3370147  | 0.0000000 |
| C | -2.6414915 | 1.4973074  | 0.0000000 |
| N | -3.4978694 | 2.2991904  | 0.0000000 |
| H | -2.9734639 | -1.1443308 | 0.0000000 |
| F | 4.8619387  | 1.1905245  | 0.0000000 |
| H | 5.7473759  | 1.4570321  | 0.0000000 |

**12.**

|   |            |            |            |
|---|------------|------------|------------|
| C | -1.2988737 | -0.5203244 | 0.0008611  |
| C | 0.0844927  | -0.5709834 | 0.0014413  |
| C | 0.7940670  | 0.6387386  | 0.0000667  |
| C | 0.1079518  | 1.8628193  | -0.0018128 |
| C | -1.2825503 | 1.8705233  | -0.0023221 |
| C | -2.0016151 | 0.6767870  | -0.0009854 |
| H | 0.5963060  | -1.5259929 | 0.0029183  |
| H | 0.6695634  | 2.7896049  | -0.0029260 |
| H | -1.8152672 | 2.8146291  | -0.0038352 |

|   |            |            |            |
|---|------------|------------|------------|
| H | -3.0849581 | 0.6600085  | -0.0013617 |
| C | 2.2145272  | 0.6203018  | 0.0005381  |
| C | 3.4397484  | 0.6089630  | 0.0009251  |
| F | -1.9837236 | -1.6725564 | 0.0021744  |
| C | 4.8064087  | 0.5967443  | 0.0013462  |
| N | 5.9851970  | 0.5868149  | 0.0017061  |
| F | -3.4303015 | -4.2945663 | 0.0006769  |
| H | -3.8009726 | -5.1415111 | 0.0005891  |

**13.**

|   |            |            |           |
|---|------------|------------|-----------|
| C | -0.0046582 | -1.7177744 | 0.0000000 |
| C | 1.2021481  | -1.0399077 | 0.0000000 |
| C | -1.1481004 | 0.3553313  | 0.0000000 |
| C | -1.2075243 | -1.0329360 | 0.0000000 |
| H | 2.1427053  | -1.5757126 | 0.0000000 |
| H | -2.0566206 | 0.9479869  | 0.0000000 |
| H | -2.1511644 | -1.5632923 | 0.0000000 |
| F | -0.0085310 | -3.0560944 | 0.0000000 |
| N | 0.0033449  | 1.0396519  | 0.0000000 |
| C | 1.1507846  | 0.3486848  | 0.0000000 |
| H | 2.0627288  | 0.9360554  | 0.0000000 |
| H | 0.0063436  | 2.6983955  | 0.0000000 |
| F | 0.0085439  | 3.6596116  | 0.0000000 |

**14.**

|   |            |            |           |
|---|------------|------------|-----------|
| C | -0.0041360 | -1.9026826 | 0.0000000 |
| C | 1.2031758  | -1.2239296 | 0.0000000 |
| C | -1.1569139 | 0.1678158  | 0.0000000 |
| C | -1.2085159 | -1.2187565 | 0.0000000 |
| H | 2.1438005  | -1.7597717 | 0.0000000 |
| H | -2.0590330 | 0.7696522  | 0.0000000 |
| H | -2.1514197 | -1.7505827 | 0.0000000 |
| F | -0.0069956 | -3.2379765 | 0.0000000 |
| N | 0.0017467  | 0.8417741  | 0.0000000 |
| C | 1.1575075  | 0.1628460  | 0.0000000 |
| H | 2.0621795  | 0.7608601  | 0.0000000 |
| I | 0.0070296  | 3.2058458  | 0.0000000 |
| F | 0.0115747  | 5.1849053  | 0.0000000 |

**15.**

|   |            |           |            |
|---|------------|-----------|------------|
| C | 0.0000000  | 0.0000000 | -2.4679986 |
| C | 1.2166527  | 0.0000000 | -1.8014041 |
| C | 1.2165540  | 0.0000000 | -0.4123742 |
| C | 0.0000000  | 0.0000000 | 0.2795957  |
| C | -1.2165540 | 0.0000000 | -0.4123742 |
| C | -1.2166527 | 0.0000000 | -1.8014041 |
| H | 2.1396244  | 0.0000000 | -2.3684590 |
| H | 2.1509698  | 0.0000000 | 0.1365817  |
| H | -2.1509698 | 0.0000000 | 0.1365817  |
| H | -2.1396244 | 0.0000000 | -2.3684590 |
| C | 0.0000000  | 0.0000000 | 1.7079420  |

|   |           |           |            |
|---|-----------|-----------|------------|
| N | 0.0000000 | 0.0000000 | 2.8773542  |
| F | 0.0000000 | 0.0000000 | -3.8094966 |
| F | 0.0000000 | 0.0000000 | 5.6219967  |
| H | 0.0000000 | 0.0000000 | 4.6819180  |

**16.**

|   |            |           |            |
|---|------------|-----------|------------|
| C | 0.0000000  | 0.0000000 | -2.6240543 |
| C | 1.2170494  | 0.0000000 | -1.9576354 |
| C | 1.2177077  | 0.0000000 | -0.5689549 |
| C | 0.0000000  | 0.0000000 | 0.1217392  |
| C | -1.2177077 | 0.0000000 | -0.5689549 |
| C | -1.2170494 | 0.0000000 | -1.9576354 |
| H | 2.1397947  | 0.0000000 | -2.5250622 |
| H | 2.1519640  | 0.0000000 | -0.0196877 |
| H | -2.1519640 | 0.0000000 | -0.0196877 |
| H | -2.1397947 | 0.0000000 | -2.5250622 |
| C | 0.0000000  | 0.0000000 | 1.5476179  |
| N | 0.0000000  | 0.0000000 | 2.7170772  |
| F | 0.0000000  | 0.0000000 | -3.9645814 |
| I | 0.0000000  | 0.0000000 | 5.1987953  |
| F | 0.0000000  | 0.0000000 | 7.1460864  |

**17.**

|   |            |           |            |
|---|------------|-----------|------------|
| C | 0.0000000  | 0.0000000 | -3.3549763 |
| C | 1.2160009  | 0.0000000 | -2.6870570 |
| C | 1.2151774  | 0.0000000 | -1.2982563 |
| C | 0.0000000  | 0.0000000 | -0.5968335 |
| C | -1.2151774 | 0.0000000 | -1.2982563 |
| C | -1.2160009 | 0.0000000 | -2.6870570 |
| H | 2.1394879  | 0.0000000 | -3.2536345 |
| H | -2.1510099 | 0.0000000 | -0.7511015 |
| H | -2.1394879 | 0.0000000 | -3.2536345 |
| F | 0.0000000  | 0.0000000 | -4.6974099 |
| H | 2.1510099  | 0.0000000 | -0.7511015 |
| C | 0.0000000  | 0.0000000 | 0.8222287  |
| C | 0.0000000  | 0.0000000 | 2.0474067  |
| C | 0.0000000  | 0.0000000 | 3.4114105  |
| N | 0.0000000  | 0.0000000 | 4.5866938  |
| H | 0.0000000  | 0.0000000 | 6.4114948  |
| F | 0.0000000  | 0.0000000 | 7.3500837  |

**18.**

|   |            |           |            |
|---|------------|-----------|------------|
| C | 0.0000000  | 0.0000000 | -3.4903142 |
| C | 1.2162102  | 0.0000000 | -2.8224588 |
| C | 1.2157668  | 0.0000000 | -1.4338198 |
| C | 0.0000000  | 0.0000000 | -0.7330286 |
| C | -1.2157668 | 0.0000000 | -1.4338198 |
| C | -1.2162102 | 0.0000000 | -2.8224588 |
| H | 2.1396071  | 0.0000000 | -3.3891600 |

|   |            |           |            |
|---|------------|-----------|------------|
| H | -2.1516033 | 0.0000000 | -0.8866689 |
| H | -2.1396071 | 0.0000000 | -3.3891600 |
| F | 0.0000000  | 0.0000000 | -4.8321385 |
| H | 2.1516033  | 0.0000000 | -0.8866689 |
| C | 0.0000000  | 0.0000000 | 0.6850468  |
| C | 0.0000000  | 0.0000000 | 1.9111460  |
| C | 0.0000000  | 0.0000000 | 3.2713207  |
| N | 0.0000000  | 0.0000000 | 4.4471673  |
| I | 0.0000000  | 0.0000000 | 6.9295042  |
| F | 0.0000000  | 0.0000000 | 8.8755111  |

**19.**

|   |            |            |           |
|---|------------|------------|-----------|
| C | -1.1748884 | -1.0165468 | 0.0000000 |
| C | 0.2032619  | -1.1758636 | 0.0000000 |
| C | 0.4884715  | 1.1127564  | 0.0000000 |
| C | -0.8846835 | 1.3339045  | 0.0000000 |
| C | -1.7481765 | 0.2433348  | 0.0000000 |
| H | 0.6506227  | -2.1639794 | 0.0000000 |
| H | 1.1933492  | 1.9366412  | 0.0000000 |
| H | -1.2719854 | 2.3454713  | 0.0000000 |
| H | -2.8260388 | 0.3530086  | 0.0000000 |
| N | 1.0208605  | -0.1169154 | 0.0000000 |
| F | -1.9546498 | -2.1044015 | 0.0000000 |
| H | 2.6751655  | -0.3187674 | 0.0000000 |
| F | 3.6286913  | -0.4286426 | 0.0000000 |

**20.**

|   |            |            |           |
|---|------------|------------|-----------|
| C | -1.3548300 | -0.9965158 | 0.0000000 |
| C | 0.0225631  | -1.1566907 | 0.0000000 |
| C | 0.3021213  | 1.1479351  | 0.0000000 |
| C | -1.0715391 | 1.3571796  | 0.0000000 |
| C | -1.9306035 | 0.2632447  | 0.0000000 |
| H | 0.4846938  | -2.1377865 | 0.0000000 |
| H | 1.0131335  | 1.9661315  | 0.0000000 |
| H | -1.4625159 | 2.3672801  | 0.0000000 |
| H | -3.0086865 | 0.3696724  | 0.0000000 |
| N | 0.8264155  | -0.0860939 | 0.0000000 |
| F | -2.1296820 | -2.0836388 | 0.0000000 |
| I | 3.1733877  | -0.3817192 | 0.0000000 |
| F | 5.1355421  | -0.6289986 | 0.0000000 |

**21.**

|   |            |            |           |
|---|------------|------------|-----------|
| C | 1.9101732  | 0.9778936  | 0.0000000 |
| C | 2.4976573  | -0.2793171 | 0.0000000 |
| C | 1.6734178  | -1.4023655 | 0.0000000 |
| C | 0.2890249  | -1.2671240 | 0.0000000 |
| C | -0.2690909 | 0.0160992  | 0.0000000 |
| C | 0.5376692  | 1.1591550  | 0.0000000 |
| H | 3.5778459  | -0.3632505 | 0.0000000 |
| H | 2.1173454  | -2.3909591 | 0.0000000 |
| H | 0.1135226  | 2.1559206  | 0.0000000 |
| F | 2.6999655  | 2.0613466  | 0.0000000 |
| C | -1.6905762 | 0.1665192  | 0.0000000 |

|   |            |            |           |
|---|------------|------------|-----------|
| N | -2.8540556 | 0.2852020  | 0.0000000 |
| H | -0.3575481 | -2.1363142 | 0.0000000 |
| H | -4.6550431 | 0.4632397  | 0.0000000 |
| F | -5.5903079 | 0.5539545  | 0.0000000 |

**22.**

|   |            |            |           |
|---|------------|------------|-----------|
| C | 2.0442701  | 1.0149122  | 0.0000000 |
| C | 2.6590341  | -0.2295028 | 0.0000000 |
| C | 1.8604687  | -1.3709527 | 0.0000000 |
| C | 0.4734985  | -1.2674169 | 0.0000000 |
| C | -0.1116018 | 0.0041082  | 0.0000000 |
| C | 0.6681411  | 1.1661379  | 0.0000000 |
| H | 3.7408568  | -0.2893196 | 0.0000000 |
| H | 2.3266817  | -2.3492071 | 0.0000000 |
| H | 0.2215717  | 2.1530982  | 0.0000000 |
| F | 2.8096658  | 2.1145818  | 0.0000000 |
| C | -1.5337934 | 0.1219776  | 0.0000000 |
| N | -2.6998273 | 0.2129997  | 0.0000000 |
| H | -0.1538856 | -2.1505299 | 0.0000000 |
| I | -5.1812116 | 0.3742071  | 0.0000000 |
| F | -7.1238688 | 0.4949060  | 0.0000000 |

**23.**

|   |            |            |           |
|---|------------|------------|-----------|
| C | -2.7355331 | -1.0448656 | 0.0000000 |
| C | -1.3555817 | -1.1481657 | 0.0000000 |
| C | -0.6044440 | 0.0362468  | 0.0000000 |
| C | -1.2436822 | 1.2852652  | 0.0000000 |

|   |            |            |           |
|---|------------|------------|-----------|
| C | -2.6328823 | 1.3434795  | 0.0000000 |
| C | -3.3945698 | 0.1764962  | 0.0000000 |
| H | -0.8785746 | -2.1210086 | 0.0000000 |
| H | -0.6486753 | 2.1909228  | 0.0000000 |
| H | -3.1310026 | 2.3061364  | 0.0000000 |
| H | -4.4777794 | 0.1997281  | 0.0000000 |
| C | 0.8136032  | -0.0335780 | 0.0000000 |
| C | 2.0377076  | -0.0887014 | 0.0000000 |
| F | -3.4634602 | -2.1724158 | 0.0000000 |
| C | 3.4003703  | -0.1492198 | 0.0000000 |
| N | 4.5745950  | -0.2005760 | 0.0000000 |
| H | 6.4011138  | -0.2723436 | 0.0000000 |
| F | 7.3387954  | -0.3074004 | 0.0000000 |

**24.**

|   |            |            |           |
|---|------------|------------|-----------|
| C | -2.8710560 | -1.0388376 | 0.0000000 |
| C | -1.4910840 | -1.1425281 | 0.0000000 |
| C | -0.7404328 | 0.0423869  | 0.0000000 |
| C | -1.3788799 | 1.2920160  | 0.0000000 |
| C | -2.7680615 | 1.3499793  | 0.0000000 |
| C | -3.5296833 | 0.1829467  | 0.0000000 |
| H | -1.0142147 | -2.1154453 | 0.0000000 |
| H | -0.7837796 | 2.1976041  | 0.0000000 |
| H | -3.2662003 | 2.3125981  | 0.0000000 |
| H | -4.6129165 | 0.2063383  | 0.0000000 |
| C | 0.6766770  | -0.0275485 | 0.0000000 |
| C | 1.9017159  | -0.0830011 | 0.0000000 |

|   |            |            |           |
|---|------------|------------|-----------|
| F | -3.5988787 | -2.1656898 | 0.0000000 |
| C | 3.2605747  | -0.1440816 | 0.0000000 |
| N | 4.4353476  | -0.1961679 | 0.0000000 |
| I | 6.9184856  | -0.2967225 | 0.0000000 |
| F | 8.8623866  | -0.3738471 | 0.0000000 |

**25.**

|   |            |            |           |
|---|------------|------------|-----------|
| C | -0.0022857 | -0.8557625 | 0.0000000 |
| C | 1.2041051  | -0.1759692 | 0.0000000 |
| C | -1.1457191 | 1.2189486  | 0.0000000 |
| C | -1.2047858 | -0.1691111 | 0.0000000 |
| H | 2.1443861  | -0.7123038 | 0.0000000 |
| H | -2.0542164 | 1.8117025  | 0.0000000 |
| H | -2.1481062 | -0.7000815 | 0.0000000 |
| F | -0.0060848 | -2.1910434 | 0.0000000 |
| N | 0.0055763  | 1.9038232  | 0.0000000 |
| C | 1.1529485  | 1.2124049  | 0.0000000 |
| H | 2.0648145  | 1.7999613  | 0.0000000 |
| H | 0.0095032  | 3.5574948  | 0.0000000 |
| F | 0.0114128  | 4.5197538  | 0.0000000 |
| F | -0.0144602 | -5.1475988 | 0.0000000 |
| H | -0.0170883 | -6.0722187 | 0.0000000 |

**26.**

|   |            |            |           |
|---|------------|------------|-----------|
| C | 0.0104665  | -1.0224372 | 0.0000000 |
| C | 1.2139237  | -0.3356772 | 0.0000000 |
| C | -1.1527295 | 1.0439474  | 0.0000000 |
| C | -1.1969185 | -0.3426051 | 0.0000000 |
| H | 2.1571872  | -0.8669129 | 0.0000000 |
| H | -2.0576782 | 1.6414984  | 0.0000000 |
| H | -2.1370807 | -0.8793109 | 0.0000000 |
| F | 0.0142152  | -2.3544439 | 0.0000000 |
| N | 0.0025698  | 1.7240175  | 0.0000000 |
| C | 1.1617585  | 1.0506046  | 0.0000000 |
| H | 2.0632575  | 1.6533490  | 0.0000000 |
| I | -0.0042853 | 4.0827850  | 0.0000000 |
| F | -0.0100989 | 6.0641905  | 0.0000000 |
| F | -0.0261707 | -5.2671616 | 0.0000000 |
| H | -0.0384166 | -6.1918435 | 0.0000000 |

**27.**

|   |            |            |           |
|---|------------|------------|-----------|
| C | -0.0000012 | 1.6183899  | 0.0000000 |
| C | 1.2163258  | 0.9500142  | 0.0000000 |
| C | 1.2164924  | -0.4388949 | 0.0000000 |
| C | -0.0000029 | -1.1311036 | 0.0000000 |
| C | -1.2164973 | -0.4388936 | 0.0000000 |
| C | -1.2163290 | 0.9500157  | 0.0000000 |
| H | 2.1389996  | 1.5176031  | 0.0000000 |
| H | 2.1508798  | -0.9879656 | 0.0000000 |
| H | -2.1508854 | -0.9879630 | 0.0000000 |

|   |            |            |           |
|---|------------|------------|-----------|
| H | -2.1390022 | 1.5176056  | 0.0000000 |
| C | -0.0000018 | -2.5592703 | 0.0000000 |
| N | 0.0000024  | -3.7287206 | 0.0000000 |
| F | 0.0000002  | 2.9567997  | 0.0000000 |
| F | 0.0000071  | -6.4700402 | 0.0000000 |
| H | 0.0000049  | -5.5295902 | 0.0000000 |
| F | 0.0000041  | 5.9186959  | 0.0000000 |
| H | 0.0000033  | 6.8433180  | 0.0000000 |

**28.**

|   |            |            |           |
|---|------------|------------|-----------|
| C | 0.0000088  | 1.7577555  | 0.0000000 |
| C | 1.2167642  | 1.0895749  | 0.0000000 |
| C | 1.2177033  | -0.2989640 | 0.0000000 |
| C | 0.0000109  | -0.9898444 | 0.0000000 |
| C | -1.2176825 | -0.2989657 | 0.0000000 |
| C | -1.2167455 | 1.0895730  | 0.0000000 |
| H | 2.1391919  | 1.6575671  | 0.0000000 |
| H | 2.1519104  | -0.8483799 | 0.0000000 |
| H | -2.1518887 | -0.8483833 | 0.0000000 |
| H | -2.1391740 | 1.6575639  | 0.0000000 |
| C | 0.0000089  | -2.4154524 | 0.0000000 |
| N | 0.0000021  | -3.5849238 | 0.0000000 |
| F | 0.0000064  | 3.0951136  | 0.0000000 |
| I | -0.0000181 | -6.0612105 | 0.0000000 |
| F | -0.0000355 | -8.0095922 | 0.0000000 |
| F | -0.0000232 | 6.0419487  | 0.0000000 |
| H | -0.0000395 | 6.9666196  | 0.0000000 |

**29.**

|   |            |           |            |
|---|------------|-----------|------------|
| C | 0.0000000  | 0.0000000 | -2.4998829 |
| C | 1.2156954  | 0.0000000 | -1.8302064 |
| C | 1.2151610  | 0.0000000 | -0.4415244 |
| C | 0.0000000  | 0.0000000 | 0.2600605  |
| C | -1.2151610 | 0.0000000 | -0.4415244 |
| C | -1.2156954 | 0.0000000 | -1.8302064 |
| H | 2.1388878  | 0.0000000 | -2.3973125 |
| H | -2.1509558 | 0.0000000 | 0.1057794  |
| H | -2.1388878 | 0.0000000 | -2.3973125 |
| F | 0.0000000  | 0.0000000 | -3.8392145 |
| H | 2.1509558  | 0.0000000 | 0.1057794  |
| C | 0.0000000  | 0.0000000 | 1.6789121  |
| C | 0.0000000  | 0.0000000 | 2.9042175  |
| C | 0.0000000  | 0.0000000 | 4.2680339  |
| N | 0.0000000  | 0.0000000 | 5.4433603  |
| H | 0.0000000  | 0.0000000 | 7.2651566  |
| F | 0.0000000  | 0.0000000 | 8.2040092  |
| F | 0.0000000  | 0.0000000 | -6.8167666 |
| H | 0.0000000  | 0.0000000 | -7.7413582 |

**30.**

|   |            |            |           |
|---|------------|------------|-----------|
| C | -0.0000142 | 2.6216318  | 0.0000000 |
| C | 1.2159222  | 1.9520673  | 0.0000000 |
| C | 1.2157693  | 0.5635820  | 0.0000000 |
| C | -0.0000331 | -0.1372870 | 0.0000000 |
| C | -1.2158257 | 0.5635980  | 0.0000000 |

|   |            |            |           |
|---|------------|------------|-----------|
| C | -1.2159596 | 1.9520836  | 0.0000000 |
| H | 2.1389422  | 2.5194325  | 0.0000000 |
| H | -2.1515840 | 0.0162370  | 0.0000000 |
| H | -2.1389720 | 2.5194613  | 0.0000000 |
| F | -0.0000038 | 3.9603046  | 0.0000000 |
| H | 2.1515199  | 0.0162080  | 0.0000000 |
| C | -0.0000377 | -1.5550599 | 0.0000000 |
| C | -0.0000293 | -2.7812901 | 0.0000000 |
| C | -0.0000085 | -4.1411735 | 0.0000000 |
| N | 0.0000146  | -5.3170524 | 0.0000000 |
| I | 0.0000538  | -7.7956584 | 0.0000000 |
| F | 0.0000848  | -9.7424275 | 0.0000000 |
| F | 0.0000670  | 6.9303557  | 0.0000000 |
| H | 0.0000940  | 7.8549869  | 0.0000000 |

**31.**

|   |            |            |           |
|---|------------|------------|-----------|
| C | -0.7422483 | 0.0198643  | 0.0000000 |
| C | 0.3595669  | -0.8241083 | 0.0000000 |
| C | 1.7812250  | 0.9920836  | 0.0000000 |
| C | 0.7167416  | 1.8871376  | 0.0000000 |
| C | -0.5844995 | 1.3955449  | 0.0000000 |
| H | 0.2352836  | -1.9015736 | 0.0000000 |
| H | 2.8093137  | 1.3366958  | 0.0000000 |
| H | 0.9044320  | 2.9539558  | 0.0000000 |
| H | -1.4527967 | 2.0435245  | 0.0000000 |
| N | 1.6054759  | -0.3364530 | 0.0000000 |
| F | -1.9676827 | -0.5113807 | 0.0000000 |

|   |            |            |           |
|---|------------|------------|-----------|
| H | 2.9111023  | -1.3637983 | 0.0000000 |
| F | 3.6679328  | -1.9558734 | 0.0000000 |
| F | -4.7041154 | -1.6698644 | 0.0000000 |
| H | -5.5397313 | -2.0657547 | 0.0000000 |

**32.**

|   |            |            |           |
|---|------------|------------|-----------|
| C | -0.8877999 | -0.0823641 | 0.0000000 |
| C | 0.3772071  | -0.6517260 | 0.0000000 |
| C | 1.3435023  | 1.4595064  | 0.0000000 |
| C | 0.0979283  | 2.0751582  | 0.0000000 |
| C | -1.0525068 | 1.2935005  | 0.0000000 |
| H | 0.5194597  | -1.7267922 | 0.0000000 |
| H | 2.2693952  | 2.0231025  | 0.0000000 |
| H | 0.0319871  | 3.1563054  | 0.0000000 |
| H | -2.0476339 | 1.7216620  | 0.0000000 |
| N | 1.4681564  | 0.1243801  | 0.0000000 |
| F | -1.9534744 | -0.8813151 | 0.0000000 |
| I | 3.6096186  | -0.8674261 | 0.0000000 |
| F | 5.4064915  | -1.6996617 | 0.0000000 |
| F | -4.2982431 | -2.6144093 | 0.0000000 |
| H | -4.8840883 | -3.3299205 | 0.0000000 |

**33.**

|   |            |            |           |
|---|------------|------------|-----------|
| C | 1.4331151  | -0.0543740 | 0.0000000 |
| C | 1.5914041  | -1.4336206 | 0.0000000 |
| C | 0.4547066  | -2.2388106 | 0.0000000 |
| C | -0.8162071 | -1.6733738 | 0.0000000 |

|   |            |            |           |
|---|------------|------------|-----------|
| C | -0.9397103 | -0.2794061 | 0.0000000 |
| C | 0.1869325  | 0.5499761  | 0.0000000 |
| H | 2.5899179  | -1.8542156 | 0.0000000 |
| H | 0.5635329  | -3.3170721 | 0.0000000 |
| H | 0.1000062  | 1.6297514  | 0.0000000 |
| F | 2.5221376  | 0.7224544  | 0.0000000 |
| C | -2.2407667 | 0.3124309  | 0.0000000 |
| N | -3.3072054 | 0.7925772  | 0.0000000 |
| H | -1.7044062 | -2.2935933 | 0.0000000 |
| H | -4.9627087 | 1.5131377  | 0.0000000 |
| F | -5.8271207 | 1.8825533  | 0.0000000 |
| F | 4.8516501  | 2.5435176  | 0.0000000 |
| H | 5.5047221  | 3.1980676  | 0.0000000 |

**34.**

|   |            |            |           |
|---|------------|------------|-----------|
| C | 1.5578025  | 0.1703893  | 0.0000000 |
| C | 1.9611787  | -1.1583434 | 0.0000000 |
| C | 0.9884696  | -2.1554515 | 0.0000000 |
| C | -0.3635323 | -1.8289461 | 0.0000000 |
| C | -0.7343889 | -0.4791846 | 0.0000000 |
| C | 0.2233238  | 0.5410220  | 0.0000000 |
| H | 3.0191688  | -1.3921351 | 0.0000000 |
| H | 1.2900193  | -3.1963634 | 0.0000000 |
| H | -0.0568238 | 1.5874851  | 0.0000000 |
| F | 2.4888158  | 1.1295033  | 0.0000000 |
| C | -2.1184957 | -0.1322872 | 0.0000000 |
| N | -3.2542118 | 0.1471275  | 0.0000000 |

|   |            |            |           |
|---|------------|------------|-----------|
| H | -1.1258382 | -2.5986831 | 0.0000000 |
| I | -5.6671044 | 0.7241439  | 0.0000000 |
| F | -7.5618614 | 1.1744248  | 0.0000000 |
| F | 4.4130259  | 3.3538998  | 0.0000000 |
| H | 4.9404521  | 4.1133987  | 0.0000000 |

**35.**

|   |            |            |           |
|---|------------|------------|-----------|
| C | -2.2347379 | -0.0190394 | 0.0000000 |
| C | -0.9113589 | -0.4255711 | 0.0000000 |
| C | 0.0844741  | 0.5619602  | 0.0000000 |
| C | -0.2601631 | 1.9221827  | 0.0000000 |
| C | -1.6016701 | 2.2878580  | 0.0000000 |
| C | -2.6036961 | 1.3195136  | 0.0000000 |
| H | -0.6631184 | -1.4803003 | 0.0000000 |
| H | 0.5217041  | 2.6725178  | 0.0000000 |
| H | -1.8729004 | 3.3373063  | 0.0000000 |
| H | -3.6547748 | 1.5825788  | 0.0000000 |
| C | 1.4516273  | 0.1793998  | 0.0000000 |
| C | 2.6338199  | -0.1434860 | 0.0000000 |
| F | -3.1934533 | -0.9538891 | 0.0000000 |
| C | 3.9496639  | -0.5022204 | 0.0000000 |
| N | 5.0838765  | -0.8106660 | 0.0000000 |
| H | 6.8462656  | -1.2866491 | 0.0000000 |
| F | 7.7523527  | -1.5314444 | 0.0000000 |
| F | -5.3734370 | -2.9954148 | 0.0000000 |
| H | -5.9544738 | -3.7146365 | 0.0000000 |

**36.**

|   |            |            |           |
|---|------------|------------|-----------|
| C | -2.3418524 | -0.2319163 | 0.0000000 |
| C | -0.9829367 | -0.4963972 | 0.0000000 |
| C | -0.0975847 | 0.5914553  | 0.0000000 |
| C | -0.5833434 | 1.9080516  | 0.0000000 |
| C | -1.9560644 | 2.1294189  | 0.0000000 |
| C | -2.8499587 | 1.0604083  | 0.0000000 |
| H | -0.6245969 | -1.5189500 | 0.0000000 |
| H | 0.1148953  | 2.7367027  | 0.0000000 |
| H | -2.3369977 | 3.1442051  | 0.0000000 |
| H | -3.9229919 | 1.2108706  | 0.0000000 |
| C | 1.3010623  | 0.3537991  | 0.0000000 |
| C | 2.5106629  | 0.1512052  | 0.0000000 |
| F | -3.1958525 | -1.2623624 | 0.0000000 |
| C | 3.8516888  | -0.0751883 | 0.0000000 |
| N | 5.0112657  | -0.2708419 | 0.0000000 |
| I | 7.4615307  | -0.6611765 | 0.0000000 |
| F | 9.3841722  | -0.9632155 | 0.0000000 |
| F | -5.0974336 | -3.5307540 | 0.0000000 |
| H | -5.6456650 | -4.2753148 | 0.0000000 |

**43.**

|   |            |           |            |
|---|------------|-----------|------------|
| C | 0.0000000  | 0.0000000 | -1.0069872 |
| C | 1.2029560  | 0.0000000 | -0.3212735 |
| C | -1.1546969 | 0.0000000 | 1.0644391  |
| C | -1.2029560 | 0.0000000 | -0.3212735 |
| H | 2.1462051  | 0.0000000 | -0.8522415 |

|    |            |           |            |
|----|------------|-----------|------------|
| H  | -2.0659837 | 0.0000000 | 1.6493471  |
| H  | -2.1462051 | 0.0000000 | -0.8522415 |
| F  | 0.0000000  | 0.0000000 | -2.3372457 |
| N  | 0.0000000  | 0.0000000 | 1.7567898  |
| C  | 1.1546969  | 0.0000000 | 1.0644391  |
| H  | 2.0659837  | 0.0000000 | 1.6493471  |
| Ag | 0.0000000  | 0.0000000 | 3.8195523  |
| Cl | 0.0000000  | 0.0000000 | 6.0676258  |
| F  | 0.0000000  | 0.0000000 | -5.2277240 |
| H  | 0.0000000  | 0.0000000 | -6.1525534 |

**44.**

|    |            |           |            |
|----|------------|-----------|------------|
| C  | 0.0000000  | 0.0000000 | -1.7212161 |
| C  | 1.2174268  | 0.0000000 | -1.0534462 |
| C  | 1.2191580  | 0.0000000 | 0.3345978  |
| C  | 0.0000000  | 0.0000000 | 1.0233461  |
| C  | -1.2191580 | 0.0000000 | 0.3345978  |
| C  | -1.2174268 | 0.0000000 | -1.0534462 |
| H  | 2.1394762  | 0.0000000 | -1.6219951 |
| H  | 2.1531767  | 0.0000000 | 0.8843144  |
| H  | -2.1531767 | 0.0000000 | 0.8843144  |
| H  | -2.1394762 | 0.0000000 | -1.6219951 |
| C  | 0.0000000  | 0.0000000 | 2.4467310  |
| N  | 0.0000000  | 0.0000000 | 3.6129358  |
| F  | 0.0000000  | 0.0000000 | -3.0568295 |
| Ag | 0.0000000  | 0.0000000 | 5.6221773  |
| Cl | 0.0000000  | 0.0000000 | 7.8730256  |

|   |           |           |            |
|---|-----------|-----------|------------|
| F | 0.0000000 | 0.0000000 | -5.9811793 |
| H | 0.0000000 | 0.0000000 | -6.9059325 |

**45.**

|    |            |           |            |
|----|------------|-----------|------------|
| C  | 1.2163702  | 0.0000000 | -1.9186527 |
| C  | 1.2166863  | 0.0000000 | -0.5304996 |
| C  | 0.0000000  | 0.0000000 | 0.1691125  |
| C  | -1.2166863 | 0.0000000 | -0.5304996 |
| C  | -1.2163702 | 0.0000000 | -1.9186527 |
| C  | 0.0000000  | 0.0000000 | -2.5880036 |
| H  | 2.1524269  | 0.0000000 | 0.0168484  |
| H  | -2.1524269 | 0.0000000 | 0.0168484  |
| H  | -2.1392038 | 0.0000000 | -2.4862979 |
| C  | 0.0000000  | 0.0000000 | 1.5857468  |
| C  | 0.0000000  | 0.0000000 | 2.8126143  |
| C  | 0.0000000  | 0.0000000 | 4.1700798  |
| N  | 0.0000000  | 0.0000000 | 5.3430609  |
| Ag | 0.0000000  | 0.0000000 | 7.3490894  |
| Cl | 0.0000000  | 0.0000000 | 9.6005516  |
| H  | 2.1392038  | 0.0000000 | -2.4862979 |
| F  | 0.0000000  | 0.0000000 | -3.9254369 |
| F  | 0.0000000  | 0.0000000 | -6.8774617 |
| H  | 0.0000000  | 0.0000000 | -7.8021497 |

**46.**

|   |            |            |           |
|---|------------|------------|-----------|
| C | -0.8644076 | -0.1189002 | 0.0000000 |
| C | 0.4136434  | -0.6583802 | 0.0000000 |

|    |            |            |           |
|----|------------|------------|-----------|
| C  | 1.3294602  | 1.4685572  | 0.0000000 |
| C  | 0.0706460  | 2.0548846  | 0.0000000 |
| C  | -1.0633841 | 1.2512810  | 0.0000000 |
| H  | 0.5607297  | -1.7312779 | 0.0000000 |
| H  | 2.2310676  | 2.0673352  | 0.0000000 |
| H  | -0.0163747 | 3.1343514  | 0.0000000 |
| H  | -2.0677293 | 1.6574106  | 0.0000000 |
| N  | 1.5006250  | 0.1325394  | 0.0000000 |
| F  | -1.9066766 | -0.9460058 | 0.0000000 |
| Ag | 3.3967762  | -0.6806257 | 0.0000000 |
| Cl | 5.4674115  | -1.5545572 | 0.0000000 |
| F  | -4.1661425 | -2.7473230 | 0.0000000 |
| H  | -4.8856446 | -3.3292894 | 0.0000000 |

**47.**

|   |            |            |           |
|---|------------|------------|-----------|
| C | 1.5102843  | 0.2080121  | 0.0000000 |
| C | 1.9089775  | -1.1225219 | 0.0000000 |
| C | 0.9345787  | -2.1178701 | 0.0000000 |
| C | -0.4167019 | -1.7888500 | 0.0000000 |
| C | -0.7815773 | -0.4373991 | 0.0000000 |
| C | 0.1767901  | 0.5824123  | 0.0000000 |
| H | 2.9663993  | -1.3593928 | 0.0000000 |
| H | 1.2339600  | -3.1593395 | 0.0000000 |
| H | -0.1013919 | 1.6294775  | 0.0000000 |
| F | 2.4428061  | 1.1624551  | 0.0000000 |
| C | -2.1631386 | -0.0878875 | 0.0000000 |
| N | -3.2949500 | 0.1926883  | 0.0000000 |

|    |            |            |           |
|----|------------|------------|-----------|
| H  | -1.1810554 | -2.5565120 | 0.0000000 |
| Cl | -7.4352033 | 1.1929987  | 0.0000000 |
| Ag | -5.2470094 | 0.6673719  | 0.0000000 |
| F  | 4.4009461  | 3.1660443  | 0.0000000 |
| H  | 5.0462856  | 3.8283126  | 0.0000000 |

**48.**

|    |            |            |           |
|----|------------|------------|-----------|
| C  | -2.3170013 | -0.2547903 | 0.0000000 |
| C  | -0.9580010 | -0.5190988 | 0.0000000 |
| C  | -0.0741744 | 0.5701264  | 0.0000000 |
| C  | -0.5588029 | 1.8872210  | 0.0000000 |
| C  | -1.9315708 | 2.1076802  | 0.0000000 |
| C  | -2.8245657 | 1.0380316  | 0.0000000 |
| H  | -0.5992278 | -1.5415625 | 0.0000000 |
| H  | 0.1390000  | 2.7162297  | 0.0000000 |
| H  | -2.3130844 | 3.1221959  | 0.0000000 |
| H  | -3.8976750 | 1.1887908  | 0.0000000 |
| C  | 1.3238529  | 0.3339887  | 0.0000000 |
| C  | 2.5343926  | 0.1340747  | 0.0000000 |
| F  | -3.1698886 | -1.2836885 | 0.0000000 |
| C  | 3.8740642  | -0.0862653 | 0.0000000 |
| N  | 5.0316888  | -0.2758793 | 0.0000000 |
| Ag | 7.0116519  | -0.5944833 | 0.0000000 |
| Cl | 9.2346348  | -0.9490558 | 0.0000000 |
| F  | -4.9578271 | -3.4406571 | 0.0000000 |
| H  | -5.5474662 | -4.1528581 | 0.0000000 |
